# Supplementary material for: Introduction to the project VAHINE: VAriability of vertical and tropHIc transfer of diazotroph derived N in the south wEst Pacific
Source: Copernicus journal article supplement (doi:10.5194/bg-2015-615), 2016-01-18
Supplement: Supplementary file [file bg-2015-615-AC1-supplement.pdf]

1 **Introduction to the project VAHINE: VAriability of vertical**  
2 **and troPHic transfer of diazotroph derived N in the south**  
3 **wEst Pacific**

4  
5 **S. Bonnet<sup>1,2</sup>, T. Moutin<sup>1</sup>, M. Rodier<sup>3</sup>, J.M. Grisoni<sup>4</sup>, F. Louis<sup>4,5</sup>, E. Folcher<sup>6</sup>, B.**  
6 **Bourgeois<sup>6</sup>, J.M. Boré<sup>6</sup>, A. Renaud<sup>6</sup>**

7  
8 [1] {Aix Marseille Université, CNRS/INSU, Université de Toulon, IRD, Mediterranean  
9 Institute of Oceanography (MIO) UM 110, 13288, Marseille, France}

10 [2] {Institut de Recherche pour le Développement, AMU/ CNRS/INSU, Université de  
11 Toulon, Mediterranean Institute of Oceanography (MIO) UM 110, 98848, Noumea, New  
12 Caledonia}

13 [3] {Institut de Recherche pour le Développement, Université de la Polynésie française -  
14 Institut Malardé - Ifremer, UMR 241 Ecosystèmes Insulaires Océaniques (EIO), IRD Tahiti,  
15 PB 529, 98713 Papeete, Tahiti, French Polynesia}

16 [4] {Observatoire Océanologique de Villefranche-sur-Mer, UMS 829, Villefranche-sur-Mer,  
17 France}

18 [5] {Centre National de la Recherche Scientifique, UMR 7093, Observatoire Océanologique  
19 de Villefranche-sur-Mer, Laboratoire d'Océanographie de Villefranche-sur-Mer,  
20 Villefranche-sur-Mer, France}

21 [6] {Institut de Recherche pour le Développement, 98848, Noumea, New Caledonia}

22  
23  
24 Correspondence to: S. Bonnet ([sophie.bonnet@ird.fr](mailto:sophie.bonnet@ird.fr))  
25  
26  
27  
28  
29  
30  
31  
32  
33

1 **Abstract**

2 At the global scale, N<sub>2</sub> fixations provides the major external source of reactive nitrogen to the  
3 surface ocean, surpassing atmospheric and riverine inputs, and sustains ~50 % of new primary  
4 production in oligotrophic environments. The main goal of the VAHINE project was to study  
5 the fate of nitrogen newly fixed by diazotrophs (or diazotroph-derived nitrogen) in oceanic  
6 food webs, how it impact heterotrophic bacteria, phytoplankton and zooplankton dynamics,  
7 stocks and fluxes of biogenic elements and particle export. Three large-volume (~50 m<sup>3</sup>)  
8 mesocosms were deployed in a tropical oligotrophic ecosystem (the New Caledonia lagoon,  
9 south-eastern Pacific) and intentionally fertilized with ~0.8 μM of dissolved inorganic  
10 phosphorus (DIP) to stimulate diazotrophy and follow subsequent ecosystem stocks and  
11 fluxes changes. VAHINE was a multidisciplinary project involving close collaborations  
12 between biogeochemists, molecular ecologist, chemists, marine opticians and modelers. This  
13 introductory paper describes in detail the scientific objectives of the project as well as the  
14 implementation plan: the mesocosm description and deployment, the selection of the study  
15 site (New Caledonian lagoon) and the logistical and sampling strategy. The main hydrological  
16 and biogeochemical conditions of the study site before the mesocosms deployment and during  
17 the experiment itself are described, and a general overview of the papers published in this  
18 special issue is presented.

19  
20  
21  
22  
23  
24  
25  
26  
27  
28  
29  
30  
31  
32  
33  
34

## 1 **1 General context and objectives of the VAHINE project**

2 Climate change is now widely recognized as the major environmental problem facing the  
3 globe (IPCC, 2014) and is at the heart of human, environmental and economical issues. On a  
4 global scale, the oceanic biological carbon pump (BCP) influences climate trends: it consists  
5 of the photosynthetic fixation of carbon dioxide (CO<sub>2</sub>) by oceanic algae (phytoplankton) in  
6 the upper illuminated ocean, followed by the downward flux of some of this material mainly  
7 due to gravitational settling. The BCP transfers approximately 5-15 GT of carbon (C) from  
8 the surface ocean to the oceans interior every year (Henson et al., 2011).

9 The efficiency of our oceans to take up excess CO<sub>2</sub> largely depends on the availability of  
10 fixed nitrogen (N) (Falkowski, 1997) in the surface ocean. In the vast nitrate (NO<sub>3</sub><sup>-</sup>)-limited  
11 oligotrophic gyres, which cover ~60 % of the global ocean surface, fixed N is principally  
12 provided through the biological fixation of atmospheric dinitrogen (N<sub>2</sub>) by N<sub>2</sub>-fixing (or  
13 diazotrophic) organisms (Karl et al., 2002). Diazotrophs fix N<sub>2</sub> gas dissolved in seawater (the  
14 largest reservoir of N on Earth) into ammonium and organic N compounds. At the global  
15 scale, they provide the major external source of N for the ocean, surpassing atmospheric and  
16 riverine inputs (Gruber, 2004), and act thus as ‘natural fertilizers’, contributing to sustain life  
17 and the BCP through the so called ‘N<sub>2</sub>-primed prokaryotic C pump’ (Karl et al., 2003; Karl et  
18 al., 2012).

19 Important progress on the magnitude and the ecological role of marine N<sub>2</sub> fixation in  
20 biogeochemical cycles has been made by the international oceanographic community over the  
21 last two decades. They include the landmark discovery of unicellular diazotrophic organisms  
22 of pico- and nanoplanktonic size termed UCYN, e.g. (Zehr et al., 2001), and new and  
23 unexpected ecological niches where diazotrophs are active, such as N-rich oxygen minimum  
24 zones, e.g. (Dekaezemacker et al., 2013; Fernandez et al., 2011). Thus, we have gained a  
25 much better understanding of this process. However, a critical question that remains poorly  
26 studied is the fate of N newly fixed by diazotrophs (or diazotroph derived N, hereafter  
27 referred to as DDN) in oceanic food webs, and its impact on CO<sub>2</sub> uptake and export (BCP)  
28 (Mulholland, 2007). The VAHINE project proposes a scientific contribution to answer these  
29 questions, based on a combination of experimentation and modeling involving recently  
30 developed innovative techniques. The acronym VAHINE (VAriability of vertical and troPHic  
31 transfer of diazotroph derived N in the south wEst Pacific) was chosen in order to take  
32 reference to the Pacific culture where this experiment has been performed with the help of  
33 local people. The main scientific research priorities of the project were:

34

- 1 i) To quantify the DDN which enters the planktonic food web,  
2  
3 ii) To investigate how the development of diazotrophs influences the subsequent  
4 diversity, gene expression, and production of primary producers, heterotrophic  
5 bacterioplankton, and subsequently zooplankton abundance,  
6  
7 iii) To examine whether different functional types of diazotrophs significantly modify the  
8 stocks and fluxes of the major biogenic elements (C, N, P),  
9  
10 iv) To elucidate whether the efficiency of particulate matter export depends on the  
11 development of different functional types of diazotrophs.  
12

13 Summarized conclusions of each article composing the special issue are provided in section 4  
14 of this manuscript (Special issue presentation). Additionally, a detailed literature review on  
15 knowledge regarding the fate of DDN in the ocean is provided in the synthesis article of the  
16 present issue (Bonnet et al., 2016) together with a detailed description of the experimental and  
17 modelling results obtained during the project that answer the above scientific questions.  
18

19 Below, we focus on the technical challenges and the methods developed to answer the  
20 scientific questions of the project. Studying the fate of DDN in the ocean is technically  
21 complex. First, it requires appropriate methodologies to trace the passage of DDN through the  
22 different components of planktonic food web. During the VAHINE project, we intensively  
23 used high-resolution nanometer scale secondary ion mass spectrometry (nanoSIMS) in  
24 combination with flow cytometry cell sorting and  $^{15}\text{N}_2$  labelling to trace the passage of  $^{15}\text{N}$ -  
25 labelled DDN into several groups of non-diazotrophic phytoplankton and bacteria. This  
26 technique and results are extensively presented in Bonnet et al. (Accepted) and in this special  
27 issue (Berthelot et al., 2016; Bonnet et al., 2015) and will not be detailed here.

28 Second, it requires the monitoring of the chemical, biological and biogeochemical  
29 characteristics of a water body affected by a diazotroph bloom for a long period of time (15-  
30 30 days) to be able to follow plankton community changes, track the N transfer in the  
31 different compartments of the ecosystem (dissolved/particulate phases, small/large plankton,  
32 export material) and elaborate biogeochemical budgets. Small-scale laboratory microcosm  
33 experiments have been frequently used in ocean biogeochemical studies, but their limited  
34 realism can make extrapolations to natural systems difficult to justify. They limit the duration

1 of experiments to few days (usually 24 to 72 h), the small volumes used (few liters maximum)  
2 limit the number of parameters measured and they do not include export terms. To overcome  
3 these difficulties, we decided to use the technology of large-volume mesocosms. Mesocosms  
4 are now widely used in ecological studies (Riebesell et al., 2013; Stewart et al., 2013) and  
5 enable isolation of water masses of several cubic meters from physical dispersion for several  
6 weeks, without disturbing temperature and light conditions, taking into account the biological  
7 complexity of the planktonic ecosystem at large scales; they thus provide a powerful approach  
8 to maintain natural planktonic communities under close-to-natural self-sustaining conditions  
9 for several weeks. Moreover, the responses obtained from mesocosms studies (isolated from  
10 hydrodynamics) provide useful parameterizations for ecosystem and biogeochemical models.

11

## 12 **2 Implementation of the VAHINE project**

### 13 **2.1 Mesocosms description and deployment**

14 Among the different types of mesocosms available (Stewart et al., 2013), the model chosen  
15 for this study (surface  $4.15 \text{ m}^2$ , volume  $\sim 50 \text{ m}^3$ , Fig. 1) are sea-going mesocosms entirely  
16 transportable that can be used under low to moderate wind/wave conditions (20-25 knots/2.5  
17 wave height). They have been designed in the framework of the DUNE project (Guieu et al.,  
18 2010; Guieu et al., 2014) and consist in large transparent bags made of two  $500 \mu\text{m}$  thick films  
19 of polyethylene (PE) and vinyl acetate (EVA, 19 %), with nylon meshing in between to allow  
20 maximum resistance and light penetration (produced by HAIKONENE KY, Finland) (Fig. 2).  
21 They are 2.3 m in diameter and 15 m in height and are equipped with removable sediment  
22 traps for sinking material collection (Fig. 1, 2), a prerequisite to answering some of the  
23 questions of the project. In the framework of VAHINE, we deployed three mesocosms  
24 (hereafter named M1, M2 and M3) to ensure replication and robustness of the data.

25 The mesocosms were made of three different parts (Fig. 1, 2): i) the main cylinder, rigidified  
26 by five polyethylene rings maintaining the round shape of the bags and ending with two 8 cm  
27 width PVC circles sandwiching the bags ii) the bottom cone (2.2 m height) also made of two  
28 8 cm width PVC circles. It was equipped with the sediment trap system, on which is screwed  
29 a 250 mL flask collecting sinking material, allowing an easy daily collection and replacement  
30 by SCUBA divers, iii) the PE flotation frame supporting the bags and attached at three points  
31 by means of specific PVC cylindrical structures at the level of the upper ring and at the level  
32 of the ring just below the sea-surface. The structure was equipped with six buoys insuring the  
33 buoyancy of the system.

1 The mesocosms were moored using three screw anchors installed on the sea floor at 25 m  
2 depth. The three mesocosms were attached together and moored with the anchors screwed  
3 120° from each other and connected to sub-surface buoys, which were themselves connected  
4 to surface buoys. The complete setup was a solid mooring capable of absorbing the sea swell  
5 while maintaining a supple and strong structure and ensuring that no tension was applied  
6 directly to the bags. An *in situ* mooring line was installed on an independent screw anchor to  
7 incubate subsamples collected from the mesocosms for production measurements (primary  
8 production, N<sub>2</sub> fixation) and process studies under the same conditions as in the mesocosms.  
9 A fifth independent screw anchor was installed to hold two mobile plastic logistics platforms  
10 for instrumentation and the daily sampling by scientists.

11 The mesocosms were deployed on January 13<sup>th</sup> 2013 (day 0) with the assistance of four  
12 professional SCUBA divers. The group of three main cylinders was first deployed and the  
13 initial operations were performed on a coral shoal near the deployment site. The bags, cinched  
14 by three small elastic ropes, were placed inside and fixed to the flotation frame at three places  
15 using the designed PVC pieces. Once fixed, the system was transported to the deployment  
16 site, and attached to the subsurface buoys tethered to the screw anchors. Small ballast weights  
17 were set up at the base of the bags and the elastic ropes released, allowing the main cylinders  
18 to gently deploy vertically with the assistance of the SCUBA divers (Fig. 2e,f). Once  
19 deployed, the main cylinders were left opened for 24 h to stabilize the water column inside.  
20 The following day (day 1, January 14<sup>th</sup>), the divers closed the mesocosms by screwing  
21 together the main cylinder and the bottom cone using eight nylon screws preventing further  
22 water exchange between inside and outside the mesocosms (Guieu et al., 2010). During the  
23 entire installation, the divers remained outside the bags to minimize disturbance and potential  
24 contamination of the water column.

25

## 26 **2.2 Selection of the study site**

27 The mesocosms were deployed during austral summer conditions (January-February 2013) in  
28 the oligotrophic New Caledonian coral lagoon (Noumea lagoon). New Caledonia is located in  
29 the South West Pacific ocean, 1500 km east of Australia in the Coral Sea (Fig. 3a), and hosts  
30 one of the three largest reef systems worldwide. It still displays intact ecosystems and its  
31 ecological and patrimonial value has been recognized through its registration as a UNESCO  
32 world heritage site. This site has been chosen for several reasons: i) it is a tropical low-  
33 nutrient low-chlorophyll (LNLC) ecosystem strongly influenced by oceanic oligotrophic  
34 waters inflowing from outside the lagoon (Ouillon et al., 2010). NO<sub>3</sub><sup>-</sup> and chlorophyll a (Chl

1 a) concentrations are typically  $< 0.04 \mu\text{mol L}^{-1}$  and around  $0.10\text{-}0.15 \mu\text{g L}^{-1}$ , respectively,  
2 during the summer season (Fichez et al., 2010). ii) Primary productivity is N-limited  
3 throughout the year (Torréton et al., 2010) giving  $\text{N}_2$ -fixing microorganisms a competitive  
4 advantage over non-diazotrophic organisms. New Caledonian waters support high  $\text{N}_2$  fixation  
5 rates ( $151\text{-}703 \mu\text{mol N m}^{-2} \text{d}^{-1}$ , Garcia et al., 2007), high *Trichodesmium* spp. abundances  
6 (Dupouy et al., 2000; Rodier and Le Borgne, 2010, 2008) as well as unicellular diazotrophic  
7 cyanobacteria (UCYN) (Biegala and Raimbault, 2008). The New Caledonian lagoon therefore  
8 represented an ideal location to track the fate of DDN in the ecosystem and implement the  
9 VAHINE project.

10 Before the VAHINE project, the mesocosms chosen for this study had only been deployed in  
11 protected bays of the temperate Mediterranean Sea, which is not submitted to tide currents  
12 and trade winds as New Caledonia is. In order to test the resistance of the mesocosms in a  
13 tropical ecosystem submitted to trade winds (20-25 knots) and high tidal currents, and to  
14 select the ideal location to deploy the mesocosms inside the lagoon, we performed a pilot  
15 study in March 2012 (i.e. one year before the VAHINE project). Four potential study sites  
16 were tested of which the Tabou Reef ( $22^{\circ}29.073 \text{ S} - 166^{\circ}26.905 \text{ E}$ ) located in close proximity  
17 to Boulari passage (Fig. 3b, c) has been selected as the ideal location to implement the project  
18 as it met the following specifications required for the technical deployment and sustainability  
19 of the mesocosms: i) the site was protected from the dominant trade winds by the submerged  
20 reef located less than one nautical mile from the study site, ii) it was located 28 km from the  
21 New Caledonian coast at the exit of the lagoon and was strongly influenced by oceanic  
22 waters, typical of a LNLC environment (see below, initial conditions), iii) it was 25 m-deep,  
23 which is in the range required (17-25 m) to deploy 15 m high mesocosms and insure the  
24 SCUBA divers security, iv) the seafloor was mainly composed of sand, which is a  
25 prerequisite to implant to screw anchors in the substrate, v) it is seldom visited by amateur  
26 yatchmen.

27

### 28 **2.3 DIP fertilization**

29 Dissolved inorganic phosphorus (DIP) availability has been reported to control  $\text{N}_2$  fixation in  
30 the southwest Pacific (Moutin et al., 2008; Moutin et al., 2005). To alleviate any potential DIP  
31 limitation in the mesocosms and enhance a bloom of diazotrophs for the purpose of this study,  
32 the mesocosms were intentionally fertilized with  $\sim 0.8 \mu\text{mol L}^{-1}$  of DIP on the evening of day  
33 4 (January 16<sup>th</sup>) of the experiment. Such concentrations have already been measured in the  
34 New Caledonian lagoon and were shown to be able to stimulate  $\text{N}_2$  fixation. The amount of

1 DIP added was also chosen based on the modelling work performed by Gimenez et al. (2016),  
2 confirming a clear stimulation of  $N_2$  fixation by  $0.8 \mu\text{mol L}^{-1}$  DIP in our experimental  
3 systems, and an absence of stimulation without any DIP enrichment.

4 We diluted 5.66 g of  $\text{KH}_2\text{PO}_4$  in three 20-L carboys filled with filtered surface seawater  
5 collected close to the mesocosms. The carboy contents were homogenized and 20 L of each  
6 solution were then been carefully introduced in each mesocosm from the bottom to the  
7 surface through a braided PVC tubing (inner diameter = 9.5 mm) connected to a Teflon pump  
8 (St-Gobain Performance Plastics) gradually lifted up during the  $\text{KH}_2\text{PO}_4$  fertilization to insure  
9 homogenization of the solution.

10 When deployed, the mesocosms naturally trapped different volumes of seawater and the  
11 volume of each mesocosms had to be determined for biogeochemical budgets (Berthelot et  
12 al., 2015). As DIP concentrations were measured at three selected depths (1 m, 6 m, 12 m)  
13 before (evening of day 4) and after (morning of day 5) the fertilization, the delta DIP was  
14 used to calculate the volume of each mesocosm based on the assumption that no DIP was  
15 consumed during the night between day 4 and day 5. The DIP concentrations were  
16 homogeneous over depth on day 5 and the mesocosm volumes were calculated as  $52,790 \pm 490$   
17 L for M1,  $42,620 \pm 430$  L for M2 and  $50,240 \pm 300$  L for M3, with the uncertainties calculated  
18 from standard deviation of triplicate DIP measurements.

19 New Caledonian soils are very rich in metals. A third of its surface ( $5500 \text{ km}^2$ ) is covered by  
20 soils originating from ultramafic rocks which have exceptionally high levels of metals such as  
21 Fe, Ni, Cr, Co, and Mn (Jaffré, 1980). Consequently, dissolved trace metals are particularly  
22 abundant in the Noumea lagoon (Migon et al., 2007). Iron concentrations measured during the  
23 Diapalis cruises around New Caledonia were higher than those reported in the sub-tropical  
24 North Pacific and the high iron inputs in this region are hypothesized to drive the South West  
25 Pacific towards a DIP depletion (Van Den Broeck et al., 2004). Metals were thus not  
26 supplemented to the mesocosms.

27

## 28 **2.4 Logistics, sampling strategy**

29 As the mesocosms were moored 28 km off the coast, all the experimental work had to be  
30 performed on site: scientific laboratories were setup on the R/V Alis (28.5 m) moored 0.5  
31 nautical mile from the mesocosms, and on the Amédée sand island located one nautical mile  
32 from the mesocosms (Fig. 3b, c), on which we set up a laboratory and accommodated  
33 scientists for the duration of the VAHINE experiment.



1 Sampling in the mesocosms started on January 15<sup>th</sup> (day 2). The experiment lasted for 23 days  
2 for logistical reasons (i.e. until February 6<sup>th</sup>) and sampling was performed daily at 7 am from  
3 the sampling platform moored next to the mesocosms. Every day after collection, seawater  
4 samples were immediately carried out to the R/V Alis and the Amédée for immediate  
5 processing.

6 Discrete samples were collected at three selected depths (1 m, 6 m, 12 m) in each mesocosm  
7 and outside (hereafter termed ‘lagoon waters’) using a braided PVC tubing connected to the  
8 Teflon PFA pump activated by pressurized air from diving tanks, allowing sampling of large  
9 volumes with the least possible perturbation inside the mesocosms. For stock measurements,  
10 50-L PE carboys were filled at each depth of each mesocosm, immediately transported  
11 onboard the R/V Alis for subsampling and samples treatments. For flux measurements  
12 (primary production, bacterial production, N<sub>2</sub> fixation), samples were directly collected in  
13 incubation bottles and transported onboard to avoid the subsampling step and minimize the  
14 time between collection, tracer spikes and incubation. For prokaryotic diversity and gene  
15 expression measurements, 10-L carboys were filled (from M1 only) and carried out to the  
16 Amédée laboratory for immediate processing. A total of 220 L were sampled every day from  
17 each mesocosms, corresponding to ~10 % of the total mesocosms volume sampled at the end  
18 of the 23-days experiment.

19 After seawater sampling, vertical CTD profiles were performed (around 10 am) using a SBE  
20 19 plus Seabird CTD in each mesocosm and outside the mesocosms to document the vertical  
21 structure of temperature, salinity and fluorescence. The CTD *in situ* fluorescence data were  
22 fitted to the Chl *a* data from fluorometry measurements using a linear least squares regression.  
23 Sediment traps were then collected daily from each mesocosm by two SCUBA divers (Fig.  
24 2e, f1). They followed the same protocol everyday: they gently tapped the cone of the  
25 mesocosms to dislodge sinking material retained on the walls, waited for 15 minutes, and  
26 collected the 250 mL flasks screwed to the trap system of each mesocosm and immediately  
27 replaced it with a new one.

28 Vertical net hauls were performed every four days using a 30 cm diameter, 100 cm long, 80  
29 µm mesh net fitted with a filtering cod end. On each sampling occasion, three vertical hauls  
30 were collected from each mesocosm and lagoon waters, representing a total volume of 2.13  
31 m<sup>3</sup>, i.e. 4 % of the total mesocosm volume. This sampling strategy was chosen to minimize  
32 the effect of zooplankton catches on the plankton abundance and composition in the  
33 mesocosms.

34

## 1 **2.5 Replicability among the mesocosms**

2 Guieu et al. (2010) and Guieu et al. (2014) have performed several mesocosm experiments in  
3 the Mediterranean Sea and demonstrated that the type of mesocosms used in the present study  
4 is well adapted to conduct replicated process studies on the first levels of the pelagic food web  
5 in LNLC environments. In order to evaluate the reproducibility among the three mesocosms  
6 deployed during VAHINE, we calculated the coefficient of variation (CV, %) of the main  
7 stocks and fluxes measured every day for 23 days for every sampling depth (Table 1, the  
8 methods are described in detail in the publications composing this special issue). The CV  
9 ranged from 4 to 42 % depending on the parameter considered. It was lowest for TOC and  
10 DON concentrations (4 and 9 %, respectively), which is very satisfying as these CV are close  
11 to the precision of the methods themselves, indicating a good reproducibility between  
12 mesocosms. It was highest for  $\text{NO}_3^-$  concentrations (42 %), which is consistent with the fact  
13 that  $\text{NO}_3^-$  concentrations were close to quantification limits of conventional methods ( $\sim 0.05$   
14  $\mu\text{mol L}^{-1}$ ) during the 23-days experiment: when the mean value is close to zero, the CV  
15 approaches infinity and is therefore sensitive to small changes in the mean. For flux  
16 measurements of PP, BP and  $\text{N}_2$  fixation, the CV's were 29, 26 and 34%, respectively, which  
17 is also satisfying given the natural spatial heterogeneity of plankton in the environment due to  
18 aggregation, (Seebah et al., 2014), or to the buoyancy of some diazotrophs such as  
19 *Trichodesmium* (Capone et al., 1997), which introduces spatial variability, well known in the  
20 natural environment for  $\text{N}_2$  fixation (Bombar et al., 2015).

21 Another criterion to evaluate the consistency between mesocosms is to compare the evolution  
22 of the biogeochemical conditions and the plankton community composition between  
23 mesocosms. This approach is described in details in several articles of the present issue and  
24 only some general features will be given here. As an example, bulk  $\text{N}_2$  fixation rates averaged  
25  $18.5 \pm 1.1 \text{ nmol N L}^{-1} \text{ d}^{-1}$  (standard deviation was calculated on the average  $\text{N}_2$  fixation rates of  
26 each mesocosm) over the 23 days of the experiment (all depths averaged together).  $\text{N}_2$   
27 fixation rates did not differ significantly among the three mesocosms ( $p < 0.05$ , Kruskal-  
28 Wallis test, (Berthelot et al., 2015). Moreover, we consistently observed the same temporal  
29 dynamics over the three mesocosms, such as the dramatic increase of rates from days 15 to 23  
30 (during which they reached  $27.3 \pm 1.0 \text{ nmol N L}^{-1} \text{ d}^{-1}$ ). This together indicates good  
31 replicability between the mesocosms (Bonnet et al., 2015). Molecular data also report a shift  
32 in the diazotrophic community composition around day 15, with a bloom of UCYN-C  
33 consistently occurring in the three mesocosms, see (Turk-Kubo et al., 2015). The same feature  
34 was observed for *Synechococcus* abundances, which increased by a factor of two since day 15

1 to day 23 in every mesocosm (Leblanc et al., 2016). Finally, the diatom community which  
2 was very diverse during the first half of the experiment suddenly shifted beginning ~day 10  
3 and *Cylindrotheca closterium* consistently became the dominant diatoms in the three  
4 mesocosms (Leblanc et al., 2016). These observations, together with the CV reported above  
5 indicate that biogeochemical and biological conditions were comparable between the three  
6 mesocosms.

7

### 8 **3 Initial conditions and evolution of the core parameters during the** 9 **experiment**

10 Initial hydrological and biogeochemical conditions (i.e. conditions in ambient waters the day  
11 of mesocosms deployment - January 13<sup>th</sup>, day 0) are summarized in Table 2. Seawater  
12 temperature was 25.30°C, which is slightly lower than the temperature reported at this season  
13 at the Amédée lighthouse station, while salinity (35.15) was typical for the season (Le Borgne  
14 et al., 2010). NO<sub>3</sub><sup>-</sup> and DIP concentrations were both reported at 0.04±0.01 μmol L<sup>-1</sup>, and Chl  
15 *a* concentrations from fluorescence data (0.11 μg L<sup>-1</sup>) were typical of oligotrophic systems  
16 and in the range reported in the literature for this location (Fichez et al., 2010). Dissolved  
17 organic N (DON) and P (DOP) concentrations were 4.65±0.46 and 0.100±0.002 and ambient  
18 N<sub>2</sub> fixation rates 8.70±1.70 nmol N L<sup>-1</sup> day<sup>-1</sup> before the mesocosms deployment.

19 Seawater temperature measured daily by vertical CTD profiles inside the mesocosms and in  
20 the lagoon waters (Fig. 4a-d) gradually increased over the 23-days of the experiment from  
21 25.50°C the day of the mesocosms closure (day 2) to 26.24°C on day 23. This warming is the  
22 typical trend observed in New Caledonia along the summer season (Le Borgne et al., 2010).  
23 The water column was vertically homogeneous over the course of the experiment, except the  
24 two first days, which were characterized by a slight stratification inside and outside the  
25 mesocosms. Data indicate therefore a good reproducibility between the three mesocosms and  
26 between the mesocosms and the Noumea lagoon waters.

27 Salinity data (Fig. 4e-h) indicate a small and gradual increase in the three mesocosms during  
28 the 23-days experiment (35.2 to 35.4) suggesting a probable higher level of evaporation in the  
29 mesocosms compared to the Noumea lagoon. Moreover, lagoon waters constantly receive  
30 some low salinity waters from the coast due to rainfall advected by tide currents, which may  
31 also explain the slightly lower salinity values measured in the Noumea lagoon (35.40)  
32 compared to inside (35.47) at the end of the experiment.

33 NO<sub>3</sub><sup>-</sup> concentrations (Fig. 5a-d) remained below 0.1 μmol L<sup>-1</sup> during the whole experiment in  
34 all mesocosms and in the lagoon waters. Average concentrations over the 23-days experiment

1 and the three depths samples were close to detection limits of the method ( $0.01 \mu\text{mol L}^{-1}$ ) and  
2 are thus difficult to quantify accurately: they were  $0.04 \pm 0.02 \mu\text{mol L}^{-1}$ ,  $0.02 \pm 0.01 \mu\text{mol L}^{-1}$ ,  
3  $0.02 \pm 0.02 \mu\text{mol L}^{-1}$ , and  $0.06 \pm 0.04 \mu\text{mol L}^{-1}$  in M1, M2, M3 and in the lagoon waters,  
4 respectively. DIP concentrations (Fig. 5e-h) were also close to detection limits ( $0.005 \mu\text{mol L}^{-1}$ )  
5 and on average  $0.04 \pm 0.01$ ,  $0.03 \pm 0.01$  and  $0.03 \pm 0.02 \mu\text{mol L}^{-1}$  before the DIP fertilization  
6 (days 2 to 4, hereafter called P0) in M1, M2 and M3 (average over the three depths). They  
7 increased after the fertilization on day 5 to  $0.73 \pm 0.07$ ,  $0.98 \pm 0.01$ ,  $0.77 \pm 0.03 \mu\text{mol L}^{-1}$  in M1,  
8 M2 and M3. The intensity of the DIP fertilization differed slightly among the mesocosms,  
9 likely reflecting the different volume of the mesocosms (see above). Subsequently DIP  
10 concentrations decreased steadily towards initial concentrations by the end of the experiment:  
11  $0.03 \pm 0.01$ ,  $0.03 \pm 0.01$  and  $0.05 \pm 0.02 \mu\text{mol L}^{-1}$  in M1, M2 and M3, respectively (average of  
12 days 23 over the three depths). However, the DIP pool was first exhausted in M1 (day 14),  
13 then M2 (day 19) and finally M3 (day 23). A more detailed description of the evolution of  
14 stocks and fluxes of biogenic elements during the experiment can be found in (Berthelot et al.,  
15 2015).

16 Chl *a* fluorescence was homogenous throughout the water column during the course of the  
17 experiment (Fig. 4i-l). Chl *a* slightly increased (by  $0.1$  to  $0.2 \mu\text{g L}^{-1}$ ) in the three mesocosms  
18 after DIP fertilization on days 5 and 6. After day 6, they consistently declined back to the  
19 initial (before fertilization) concentrations of  $0.12$ - $0.15 \mu\text{g L}^{-1}$ . On days 12, 13 and 14, Chl *a*  
20 concentrations re-increased dramatically to reach  $0.61$ ,  $0.65$  and  $1.02 \mu\text{g L}^{-1}$  in M1, M2 and  
21 M3 at day 23, respectively, indicating that the three mesocosms were relatively synchronized  
22 but the intensity of the phytoplankton bloom differed between the mesocosms, with a greater  
23 increase observed in M3 compared to M2 and M1. In the lagoon waters, Chl *a* concentrations  
24 also gradually increased over the experiment (concentrations reached  $0.35 \mu\text{g L}^{-1}$  at day 23)  
25 but to a lower extend compared to that of the mesocosms.

26

#### 27 **4 Special issue presentation**

28 The goal of this special issue is to present the knowledge gained regarding the fate of DDN in  
29 a LNLC ecosystem based on the large dataset acquired during the VAHINE mesocosm  
30 experiment. VAHINE was a multidisciplinary project involving close collaborations between  
31 biogeochemists, molecular ecologist, chemists, marine opticians and modelers. Most of the  
32 contributions to this special issue have benefited from this collective and collaborative effort.  
33 The philosophies and summarized results of the different papers composing the special issue  
34 are presented briefly hereafter and a synthesis paper of all the multidisciplinary approaches

1 used to answer the main scientific questions of the VAHINE project is proposed at the end of  
2 the issue (Bonnet et al., 2016).

3  
4 First, thanks to the high frequency (daily) sampling of the same water body for 23 days, this  
5 project provided a unique opportunity to characterize the diversity of the planktonic  
6 assemblage using several complementary approaches, and investigate species successions in  
7 relation to hydrological parameters, biogeochemical stocks and fluxes during a diazotroph  
8 bloom in a LNLC ecosystem. By using PCR targeting a component of the nitrogenase gene  
9 (*nifH*), sequencing and qPCR assays, Turk-Kubo et al. (2015) fully characterized the  
10 diazotroph community composition within the mesocosms and the New Caledonian  
11 (Noumea) lagoon and calculated *in situ* growth and mortality rates for natural populations of  
12 diazotrophs, which is rarely accomplished. They revealed that the diazotroph community was  
13 dominated by Diatom-Diazotroph Associations (DDAs) during the first period of the  
14 experiment after the DIP fertilization (days 5 to 14; hereafter called P1), and a bloom of  
15 UCYN-C occurred during the second half (days 15 to 23, hereafter called P2), providing an  
16 unique opportunity to compare the DDN transfer and export efficiency associated with  
17 different diazotrophs. Complementary to this approach, Pfreundt et al. (2015) used 16S tag  
18 sequencing to examine the temporal dynamics of the prokaryotic community and observed  
19 clear successions of prokaryotes during the experiment, in relation with biogeochemical  
20 parameters. In a second study, Pfreundt et al. (2016) also used metatranscriptomics to  
21 investigate the microbial gene expression dynamics from diazotrophic and non-diazotrophic  
22 taxa and highlighted specific patterns of expression of genes involved in N, DIP, iron and  
23 light utilization along the different phases of the experiment. Van Wambeke et al. (2015)  
24 revealed that heterotrophic bacterioplankton production and alkaline phosphatase activity  
25 were statistically higher during P2, concomitant with the UCYN-C bloom. Their results  
26 suggest that most of the DDN reached the heterotrophic bacterial community through indirect  
27 processes, like mortality, lysis and grazing. In parallel, Leblanc et al. (2016) focused on the  
28 phytoplankton assemblages and dynamics from pigment signatures, flow cytometry and  
29 taxonomy analyses and revealed a monospecific bloom of the diatom *Cylindrotheca*  
30 *closterium* and an 2-fold increase in *Synechococcus* and nano-phytoeukaryotes during P2.  
31 Tedetti et al. (2015) used bio-optical techniques to describe the spectral characteristics and the  
32 variability of dissolved and particulate chromophoric materials according to the  
33 phytoplankton community composition and revealed a coupling between the dynamics of the  
34 N<sub>2</sub> fixation and that of chromophoric material in the South West Pacific. Berman-Frank et al.

1 (2016) analyzed the spatial and temporal dynamics of transparent exopolymeric particles  
2 (TEP), which are sticky carbon rich compounds that are formed, degraded, and utilized in  
3 both biotic and abiotic processes, and measured a relatively stable TEP pool available as both  
4 a carbon source for plankton communities and facilitating aggregation and flux throughout the  
5 experiment

6 Second, the bloom of diazotrophs (UCYN-C) obtained in the closed water body of the  
7 mesocosms following DIP fertilization offered the opportunity to track the fate of DDN in the  
8 ecosystem: Berthelot et al. (2015) described the evolution of C, N, P pools and fluxes during  
9 the course of the experiment and report a 3-fold increase in Chl *a* concentrations and N<sub>2</sub>  
10 fixation rates and a 5-fold increase in C export during the second half of the experiment  
11 (UCYN-C bloom). They also reveal that the *e*-ratio that quantifies the efficiency of a system  
12 to export particulate organic C was significantly higher ( $p < 0.05$ ) during P2 than during P1,  
13 indicating that the production sustained by UCYN-C was more efficient at promoting C  
14 export than the production sustained by DDAs. Complementary to this approach Knapp et al.  
15 (2015) reported the results of  $\delta^{15}\text{N}$  measurements on DON, PON and particles from sediment  
16 traps and further substantiated these results with a significantly ( $p < 0.05$ ) higher contribution  
17 of N<sub>2</sub> fixation to export production during P2 ( $56 \pm 24$  % and up to 80 % at the end of the  
18 experiment) compared to P1 ( $47 \pm 6$  %). Bonnet et al. (2015) explored the fate of DDN at  
19 shorter time scales and revealed that  $\sim 10$  % of UCYN-C from the water column were  
20 exported daily to the traps, representing as much as  $22.4 \pm 5.5$  % of the total POC exported at  
21 the height of the UCYN-C bloom. This export was mainly due to the aggregation of small  
22 ( $5.7 \pm 0.8$   $\mu\text{m}$ ) UCYN-C cells into large (100–500  $\mu\text{m}$ ) aggregates. They also showed using a  
23 nanoSIMS approach that  $21 \pm 4$  % of the DDN was transferred to non-diazotrophic plankton,  
24 mainly picoplankton ( $18 \pm 4$  %) followed by diatoms ( $3 \pm 2$  %) during P2. The same  
25 nanoSIMS approach was used by Berthelot et al. (2016) in a parallel experimental study to  
26 compare the DDN transfer efficiency into non-diazotrophic plankton, whether it comes from  
27 UCYN-C, UCYN-B or *Trichodesmium*. They showed that the transfer was twice as high  
28 during a *Trichodesmium* bloom than during a UCYN-B or UCYN-C bloom, arguing that  
29 filamentous diazotrophs blooms are more efficient at promoting non-diazotrophic production  
30 in N depleted areas. In parallel, Hunt et al. (2016) estimated a mean  $\sim 30$  % contribution of  
31 DDN to zooplankton biomass in the mesocosms based on natural  $^{15}\text{N}$  isotope measurements  
32 on zooplankton. They also provided evidence for direct ingestion and assimilation of UCYN-  
33 C-derived N by the zooplankton, results that were complemented by qPCR assays on several  
34 diazotroph phylotypes in zooplankton guts. Spungin et al. (2016) took advantage of the

1 *Trichodesmium* bloom occurring outside the mesocosms to specifically investigate its decline  
2 and understand changes in genetic underpinning and features that could elucidate varying  
3 stressors or causes of mortality of *Trichodesmium* in the natural environment.

4 Third, modelling was used at every stage of the project. Simulations performed with the 1D-  
5 vertical biogeochemical mechanistic Eco3M-MED model have been used prior to the  
6 VAHINE experiment to help in the scientific implementation of the project (timing and  
7 quantification of the DIP fertilization). Gimenez et al. (2016) validated the model using the *in*  
8 *situ* data measured during the whole experiment, and provided additional information such as  
9 stoichiometry of planktonic organisms that could not be inferred from *in situ* measurements  
10 and offered the opportunity to deconvolute the different interlinked biogeochemical processes  
11 occurring in the ecosystem to help understanding the fate of DDN in oligotrophic ecosystems  
12 and the impact of N<sub>2</sub> fixation on carbon export.

13 Finally, a synthesis study by Bonnet et al. (2016) attempts to summarize our knowledge and  
14 the unresolved questions regarding the fate of DDN in the ocean, synthesize and link the  
15 major experimental and modelling results obtained during the project and described in the  
16 VAHINE Special issue. It reconciles the diverse and complementary methodological  
17 approaches used in this study to answer the scientific questions of the VAHINE project. After  
18 putting in perspective the different experimental findings, the modelling approach has also  
19 been used in the synthesis article as a tool to investigate the impact of N<sub>2</sub> fixation on marine  
20 productivity, export and food web composition by artificially removing N<sub>2</sub> fixation in the  
21 model.

## 24 **Acknowledgements**

25 Funding for this research was provided by the Agence Nationale de la Recherche (ANR  
26 starting grant VAHINE ANR-13-JS06-0002), the INSU-LEFE-CYBER program, GOPS and  
27 IRD. The authors thank the captain and crew of the R/V *Alis* as well as Riccardo-Rodolpho  
28 Metalpa for help in setting-up the moorings and Christophe Menkes for providing the surface  
29 chlorophyll map.

31 **Author contribution:** S. B. designed the experiments helped by T.M. J.M.G., F.L. designed  
32 the mesocosms, J.M.G., E.F., B.B., A.R. and J.M.B. deployed the mesocosms and performed  
33 CTD and traps sampling, M.R. analyzed CTD data, T.M was responsible for the nutrient  
34 analyses. S. Bonnet prepared the manuscript with contributions from all co-authors.

1 **Figure legends.**

2

3 **Figure 1.** Drawing representing the main features of the large-volume mesocosm device.

4

5 **Figure 2.** View of the experiment from the side and the seafloor during (a-c) and after the  
6 deployment (d). e-f collect of sediment traps by the SCUBA divers (Photos: J.M. Boré and E.  
7 Folcher, IRD).

8

9 **Figure 3.** Location of the study site of the VAHINE experiment. Map showing surface  
10 chlorophyll a concentrations (MODIS) in the Southwestern Pacific during the study period  
11 (January-February 2013), b) Map of the Noumea lagoon, c) a view taken from the Amédée  
12 Island showing the location of mesocosms and R/V Alis.

13

14 **Figure 4.** Horizontal and vertical distributions of seawater temperature ( $^{\circ}\text{C}$ ), salinity and  
15 fluorescence ( $\mu\text{g L}^{-1}$ ) in M1 (a,e,i), M2 (b,f,j), M3 (c,g,k), and lagoon waters (d,h,l). The grey  
16 bars indicate the timing of the DIP spike on day 4.

17

18 **Figure 5.** Horizontal and vertical distributions of  $\text{NO}_3^-$  and DIP ( $\mu\text{mol L}^{-1}$ ) in M1 (a,e), M2  
19 (b,f), M3 (c,g), and lagoon waters (d,h). The grey bars indicate the timing of the DIP spike on  
20 day 4.

21

22

23

24

25

26

27

28

29

30

31

32

33

34



## 1 References

- 2 Berman-Frank, I., Spungin, D., Rahav, E., F., V. W., Turk-Kubo, K., and Moutin, T.:  
3 Dynamics of transparent exopolymer particles (TEP) during the VAHINE mesocosm  
4 experiment in the New Caledonia lagoon, *Biogeosciences Discussions*, doi:  
5 doi:10.5194/bg-2015-612, 2016. 2016.
- 6 Berthelot, H., Bonnet, S., Grosso, O., Cornet, V., and Barani, A.: Transfer of diazotroph  
7 derived nitrogen towards non-diazotrophic planktonic communities: a comparative  
8 study between *Trichodesmium erythraeum*, *Crocospaera watsonii* and *Cyanothece* sp.,  
9 *Biogeosciences Discussions*, doi: doi:10.5194/bg-2015-607, 2016. 2016.
- 10 Berthelot, H., Moutin, T., L'Helguen, S., Leblanc, K., Hélias, S., Grosso, O., Leblond, N.,  
11 Charrière, B., and Bonnet, S.: Dinitrogen fixation and dissolved organic nitrogen fueled  
12 primary production and particulate export during the VAHINE mesocosm experiment  
13 (New Caledonia lagoon), *Biogeosciences*, 12, 4099-4112, 2015.
- 14 Biegala, I. C. and Raimbault, P.: High abundance of diazotrophic picocyanobacteria (< 3 µm)  
15 in a Southwest Pacific coral lagoon, *Aquatic Microbial Ecology*, 51, 45-53, 2008.
- 16 Bombar, D., Taylor, C. D., Wilson, S. T., Robidart, J. C., Rabines, A., Turk-Kubo, K. A.,  
17 Kemp, J. N., Karl, D. M., and Zehr, J. P.: Measurements of nitrogen fixation in the  
18 oligotrophic North Pacific Subtropical Gyre using a free-drifting submersible incubation  
19 device, *Journal of Plankton Research*, 37, 727–739, 2015.
- 20 Bonnet, S., Baklouti, M., Gimenez, A., Berthelot, H., and Berman-Frank, I.: Biogeochemical  
21 and biological impacts of diazotroph blooms in a Low Nutrient Low Chlorophyll  
22 ecosystem: synthesis from the VAHINE mesocosm experiment (New Caledonia),  
23 *Biogeosciences Discussions*, doi: doi:10.5194/bg-2015-668, 2016. 2016.
- 24 Bonnet, S., Berthelot, H., Turk-Kubo, K., Cornet-Bartaux, V., Fawcett, S. E., Berman-Frank,  
25 I., Barani, A., Dekaezemaker, J., Benavides, M., Charriere, B., and Capone, D. G.:  
26 Diazotroph derived nitrogen supports diatoms growth in the South West Pacific: a  
27 quantitative study using nanoSIMS, *Limnology and Oceanography*, Accepted.  
28 Accepted.
- 29 Bonnet, S., Berthelot, H., Turk-Kubo, K., Fawcett, S. E., Rahav, E., L'Helguen, S., and  
30 Berman-Frank, I.: Dynamics of N<sub>2</sub> fixation and fate of diazotroph-derived nitrogen in a  
31 low nutrient low chlorophyll ecosystem: results from the VAHINE mesocosm  
32 experiment (New Caledonia) *Biogeosciences Discussions*, 12, 19579-19626, 2015.
- 33 Capone, D. G., Zehr, J. P., Paerl, H. W., Bergman, B., and Carpenter, E. J.: *Trichodesmium*, a  
34 globally significant marine cyanobacterium, *Science*, 276, 1221-1229, 1997.
- 35 Dekaezemaker, J., Bonnet, S., Grosso, O., Moutin, T., Bressac, M., and Capone, D. G.:  
36 Evidence of active dinitrogen fixation in surface waters of the Eastern Tropical South  
37 Pacific during El Nino and La Nina events and evaluation of its potential nutrient  
38 controls, *Global Biogeochemical Cycles*, 27, 1-12, 2013.
- 39 Dupouy, C., Neveux, J., Subramaniam, A., Mulholland, M. R., Montoya, J. P., Campbell, L.,  
40 Carpenter, E. J., and Capone, D. G.: Satellite captures trichodesmium blooms in the  
41 southwestern tropical Pacific, *EOS*, 81, 13-16, 2000.
- 42 Falkowski, P. G.: Evolution of the nitrogen cycle and its influence on the biological  
43 sequestration of CO<sub>2</sub> in the ocean, *Nature*, 387, 272-275, 1997.
- 44 Fernandez, C., Farías, L., and Ulloa, O.: Nitrogen Fixation in Denitrified Marine Waters, *PloS*  
45 *one*, 6, e20539, 2011.
- 46 Fichez, R., Chifflet, S., Douillet, P., Gérard, P., Gutierrez, F., Jouon, A., Ouillon, S., and  
47 Grenz, C.: Biogeochemical typology and temporal variability of lagoon waters in a  
48 coral reef ecosystem subject to terrigenous and anthropogenic inputs (New Caledonia),  
49 *Marine Pollution Bulletin*, 61, 309-322, 2010.

- 1 Gimenez, A., Baklouti, M., Bonnet, S., and Moutin, T.: Biogeochemical fluxes and fate of  
2 diazotroph derived nitrogen in the food web after a phosphate enrichment: Modeling of  
3 the VAHINE mesocosms experiment, *Biogeosciences Discussions*, doi: doi:10.5194/bg-  
4 2015-611, 2016. 2016.
- 5 Gruber, N.: The dynamics of the marine nitrogen cycle and its influence on atmospheric CO<sub>2</sub>.  
6 In: *The ocean carbon cycle and climate.*, Follows, M. and Oguz, T. (Eds.), Kluwer  
7 Academic, Dordrecht, 2004.
- 8 Guieu, C., Dulac, F., Desboeufs, K., Wagener, T., Pulido-Villena, E., Grisoni, J.-M., Louis,  
9 F., Ridame, C., Blain, S., Brunet, C., Bon Nguyen, E., Tran, S., Labiadh, M., and  
10 Dominici, J.-M.: Large clean mesocosms and simulated dust deposition: a new  
11 methodology to investigate responses of marine oligotrophic ecosystems to atmospheric  
12 inputs, *Biogeosciences*, 7, 2765-2784, 2010.
- 13 Guieu, C., Dulac, F., Ridame, C., and Pondaven, P.: Introduction to project DUNE, a DUst  
14 experiment in a low Nutrient, low chlorophyll Ecosystem, *Biogeosciences*, 11, 425-442,  
15 2014.
- 16 Henson, S. A., Sanders, R., Madsen, E., Morris, J. P., Le Moigne, F., and Quartly, G. D.: A  
17 reduced estimate of the strength of the ocean's biological carbon pump, *Geophysical  
18 Research Letters*, 38, 2011.
- 19 Hunt, B. P. V., Bonnet, S., Berthelot, H., Conroy, B. J., Foster, R., and Pagano, M.:  
20 Contribution and pathways of diazotroph derived nitrogen to zooplankton during the  
21 VAHINE mesocosm experiment in the oligotrophic New Caledonia lagoon,  
22 *Biogeosciences Discussions*, doi: doi:10.5194/bg-2015-614, 2016. 2016.
- 23 Jaffré, T.: *Etude écologique du Peuplement Végétal Des Sols Dérivés de Roches  
24 Ultrabasiqes en Nouvelle-Calédonie*, Paris, 1980.
- 25 Karl, D., Michaels, A., Bergman, B., Capone, D. G., Carpenter, E. J., and Letelier, R.:  
26 Dinitrogen fixation in the world's oceans, *Biogeochemistry*, 57/58, 47-98, 2002.
- 27 Karl, D. M., Bates, N. R., Emerson, S., Harrison, P. J., Jeandel, C., Llinas, O., Liu, K. K.,  
28 Marty, J. C., Michaels, A. F., Miquel, J. C., Neuer, S., and Nojiri, Y.: *temporal studies of  
29 biogeochemical processes determined from ocean time-series observations during the  
30 JGOFS era*. In: *Ocean Biogeochemistry: The Role of the Ocean Carbon Cycle in Global  
31 Change*, Fasham, M. J. R., New York, 2003.
- 32 Karl, D. M., Church, M. J., Dore, J. E., Letelier, R., and Mahaffey, C.: Predictable and  
33 efficient carbon sequestration in the North Pacific Ocean supported by symbiotic  
34 nitrogen fixation, *Proceedings of the National Academy of Sciences*, 109, 1842–1849,  
35 2012.
- 36 Knapp, A. N., Fawcett, S. E., Martinez-Garcia, A., Leblond, N., Moutin, T., and Bonnet, S.:  
37 Nitrogen isotopic evidence for a shift from nitrate- to diazotroph-fueled export  
38 production in VAHINE mesocosm experiments, *Biogeosciences Discussions*, 12,  
39 19901-19939, 2015.
- 40 Le Borgne, R., Douillet, P., Fichez, R., and Torréton, J. P.: Hydrography and plankton  
41 temporal variabilities at different time scales in the southwest lagoon of New Caledonia:  
42 A review, *Marine Pollution Bulletin*, 61, 297-308, 2010.
- 43 Leblanc, K., Cornet-Barthaux, V., Caffin, M., Rodier, M., Desnues, A., Berthelot, H., Turk-  
44 Kubo, K., and Héliou, J.: Phytoplankton community structure in the VAHINE  
45 MESOCOSM experiment, *Biogeosciences Discussions*, doi: doi:10.5194/bg-2015-605,  
46 2016. 2016.
- 47 Migon, C., Ouillon, S., Mari, X., and Nicolas, E.: Geochemical and hydrodynamic constraints  
48 on the distribution of trace metal concentrations in the lagoon of Noumea, New  
49 Caledonia, *Estuarine, Coastal and Shelf Science*, 74, 756-765, 2007.

- 1 Moutin, T., Karl, D. M., Duhamel, S., Rimmelin, P., Raimbault, P., Van Mooy, B. A. S., and  
2 Claustre, H.: Phosphate availability and the ultimate control of new nitrogen input by  
3 nitrogen fixation in the tropical Pacific Ocean, *Biogeosciences*, 5, 95-109, 2008.
- 4 Moutin, T., Van Den Broeck, N., Beker, B., Dupouy, C., Rimmelin, P., and LeBouteiller, A.:  
5 Phosphate availability controls *Trichodesmium* spp. biomass in the SW Pacific ocean,  
6 *Marine Ecology-Progress Series*, 297, 15-21, 2005.
- 7 Mulholland, M. R.: The fate of nitrogen fixed by diazotrophs in the ocean, *Biogeosciences*, 4,  
8 37-51, 2007.
- 9 Ouillon, S., Douillet, P., Lefebvre, J. P., Le Gendre, R., Jouon, A., Bonneton, P., Fernandez, J.  
10 M., Chevillon, C., Magand, O., Lefèvre, J., Le Hir, P., Laganier, R., Dumas, F.,  
11 Marchesiello, P., Bel Madani, A., Andréfouët, S., Panché, J. Y., and Fichez, R.:  
12 Circulation and suspended sediment transport in a coral reef lagoon: The south-west  
13 lagoon of New Caledonia, *Marine Pollution Bulletin*, 61, 269, 2010.
- 14 Pfreundt, U., Spungin, D., Berman-Frank, I., Bonnet, S., and Hess, W. R.: Global analysis of  
15 gene expression dynamics within the marine microbial community during the VAHINE  
16 mesocosm experiment in the South West Pacific, *Biogeosciences Discussions*, doi:  
17 doi:10.5194/bg-2015-564, 2016. 2016.
- 18 Pfreundt, U., Van Wambeke, F., Bonnet, S., and Hess, W. R.: Succession within the  
19 prokaryotic communities during the VAHINE mesocosms experiment in the New  
20 Caledonia lagoon, *Biogeosciences Discussions*, 12, 20179-20222, 2015.
- 21 Riebesell, U., Czerny, J., von Bröckel, K., Boxhammer, T., Büdenbender, J., Deckelnick, M.,  
22 Fischer, M., Hoffmann, D., Krug, S. A., Lentz, U., Ludwig, A., Mucbe, R., and Schulz,  
23 K. G.: Technical Note: A mobile sea-going mesocosm system – new opportunities for  
24 ocean change research, *Biogeosciences*, 10, 1835-1847, 2013.
- 25 Rodier, M. and Le Borgne, R.: Population and trophic dynamics of *Trichodesmium thiebautii*  
26 in the SE lagoon of New Caledonia. Comparison with *T. erythraeum* in the SW lagoon,  
27 *Marine Pollution Bulletin*, 61, 349-359, 2010.
- 28 Rodier, M. and Le Borgne, R.: Population dynamics and environmental conditions affecting  
29 *Trichodesmium* spp. (filamentous cyanobacteria) blooms in the south-west lagoon of  
30 New Caledonia, *Journal of Experimental Marine Biology and Ecology*, 358, 20-32,  
31 2008.
- 32 Seebah, S., Fairfield, C., Ullrich, M. S., and Passow, U.: Aggregation and Sedimentation of  
33 *Thalassiosira weissflogii* (diatom) in a Warmer and More Acidified Future Ocean, *PloS*  
34 *one*, 9, 2014.
- 35 Spungin, D., Pfreundt, U., Berthelot, H., Bonnet, S., AlRoumi, D., Natale, F., Hess, H. R.,  
36 Bidle, K. D., and Berman-Frank, I.: Mechanisms of *Trichodesmium* bloom demise  
37 within the New Caledonia Lagoon during the VAHINE mesocosm experiment, doi:  
38 doi:10.5194/bg-2015-613, 2016. 2016.
- 39 Stewart, R. I. A., Dossena, M., Bohan, D. A., Jeppesen, E., Kordas, R. L., Ledger, M. E.,  
40 Meerhoff, M., Moss, B., Mulder, C., Shurin, J. B., Suttle, B., Thompson, R., Trimmer,  
41 M., and Woodward, G.: Mesocosm Experiments as a Tool for Ecological Climate-  
42 Change Research, *Advances in Ecological Research*, 48, 71-181, 2013.
- 43 Tedetti, M., Marie, L., Röttgers, R., Rodier, M., Van Wambeke, F., Helias, S., Caffin, M.,  
44 Cornet-Barthaux, V., and Dupouy, C.: Evolution of dissolved and particulate  
45 chromophoric materials during the VAHINE mesocosm experiment in the New  
46 Caledonian coral lagoon (South West Pacific), *Biogeosciences Discussions*, 12, 17453-  
47 17505, 2015.
- 48 Torréton, J.-P., Rochelle-Newall, E., Pringault, O., Jacquet, S., Faure, V., and Briand, E.:  
49 Variability of primary and bacterial production in a coral reef lagoon (New Caledonia),  
50 *Marine Pollution Bulletin*, 61, 335, 2010.

1 Turk-Kubo, K. A., Frank, I. E., Hogan, M. E., Desnues, A., Bonnet, S., and Zehr, J. P.:  
2 Diazotroph community succession during the VAHINE mesocosms experiment (New  
3 Caledonia Lagoon), *Biogeosciences*, 12, 7435-7452, 2015.

4 Van Den Broeck, N., Moutin, T., Rodier, M., and Le Bouteille, A.: Seasonal variations of  
5 phosphate availability in the SW Pacific Ocean near New Caledonia, *Marine and  
6 Ecological Progress Series*, 268, 1-12, 2004.

7 Van Wambeke, F., Pfreundt, U., Barani, A., Berthelot, H., Moutin, T., Rodier, M., Hess, W.,  
8 and Bonnet, S.: Heterotrophic bacterial production and metabolic balance during the  
9 VAHINE mesocosm experiment in the New Caledonia lagoon *Biogeosciences  
10 Discussions*, 12, 19861-19900, 2015.

11 Zehr, J. P., Waterbury, J. B., Turner, P. J., Montoya, J. P., Omoregie, E., Steward, G. F.,  
12 Hansen, A., and Karl, D. M.: New nitrogen-fixing unicellular cyanobacteria discovered  
13 in the North Pacific subtropical gyre, *Nature*, 412, 635-638, 2001.

14  
15  
16  
17  
18  
19  
20  
21  
22  
23  
24  
25  
26  
27  
28  
29  
30  
31  
32  
33  
34  
35

1 **Table 1.** Mean variation coefficients (CV = standard deviation x 100 / mean, %) calculated  
 2 for samples collected at the same time and the same depth in the three mesocosms. The CV  
 3 derived from these calculations was averaged over the 23-days experiment.

4

|                            | Parameter measured                          | CV (%) between the three mesocosms |
|----------------------------|---------------------------------------------|------------------------------------|
| <i>Standing stocks</i>     | NO <sub>3</sub> <sup>-</sup> concentrations | 42                                 |
|                            | DON concentrations                          | 9                                  |
|                            | DOP concentrations                          | 21                                 |
|                            | PON concentrations                          | 21                                 |
|                            | POP concentrations                          | 26                                 |
|                            | Chl <i>a</i> concentrations                 | 26                                 |
|                            | TOC concentrations                          | 4                                  |
|                            | TEP concentrations                          | 24                                 |
| <i>Fluxes</i>              | Primary production                          | 29                                 |
|                            | Bacterial production                        | 26                                 |
|                            | N <sub>2</sub> fixation                     | 34                                 |
| <i>Plankton abundances</i> | <i>Prochlorococcus</i> abundances           | 30                                 |
|                            | <i>Synechococcus</i> abundances             | 30                                 |
|                            | Pico-eukaryote abundances                   | 31                                 |
|                            | HNA abundances                              | 22                                 |
|                            | LNA abundances                              | 11                                 |
|                            | Average                                     | 24                                 |

5

6

7

8

9

10

11

12

13

14

15

16

17

18

19

1 **Table 2.** Initial conditions (hydrological and biogeochemical parameters) recorded at 6 m-  
2 depth just before the mesocosm deployment (January 13th).

3

| Temperature<br>(°C) | Salinity | [NO <sub>3</sub> ]<br>(μmol L <sup>-1</sup> ) | [DIP]<br>(μmol L <sup>-1</sup> ) | [Chl a fluo]<br>(μg L <sup>-1</sup> ) | [DON]<br>(μmol L <sup>-1</sup> ) | [DOP]<br>(μmol L <sup>-1</sup> ) | N <sub>2</sub> fixation<br>(nmol N L <sup>-1</sup> d <sup>-1</sup> ) |
|---------------------|----------|-----------------------------------------------|----------------------------------|---------------------------------------|----------------------------------|----------------------------------|----------------------------------------------------------------------|
| 25.30               | 35.15    | 0.04±0.01                                     | 0.04±0.01                        | 0.11                                  | 4.65±0.46                        | 0.10±0.02                        | 8.70±1.70                                                            |

4

5

6

7

8

9

10

11

12

13

14

15

16

17

18

19

20

21

22

23

24

25
